# Supplementary material
Source: PubMed Central journal article supplement (PMC2748230)
Supplement: NIHMS137566-supplement-SI.pdf [file NIHMS137566-supplement-SI.pdf]

Supplementary Online Material for

## **Dentigerumycin: a bacterial mediator of an ant-fungus symbiosis**

Dong-Chan Oh<sup>1,3</sup>, Michael Poulsen<sup>2,3</sup>, Cameron R. Currie<sup>2</sup>, and Jon Clardy<sup>1</sup>

<sup>1</sup>Department of Biological Chemistry and Molecular Pharmacology, Harvard Medical School,  
240 Longwood Ave., Boston, Massachusetts 02115, USA.

<sup>2</sup>Department of Bacteriology, University of Wisconsin-Madison, 1550 Linden Dr., Madison,  
Wisconsin 53706, USA.

<sup>3</sup>These authors contributed equally to this work

Correspondence should be addressed to C.R.C. (currie@bact.wisc.edu) or J.C.  
(jon\_clardy@hms.harvard.edu).

## Supplementary Figures

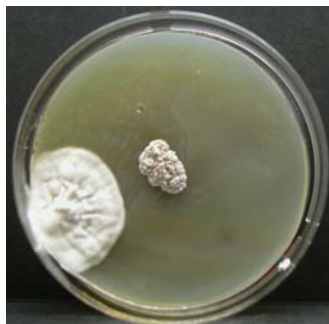

**Fig. 1.** An example of pairwise bioassay challenges of the fungal cultivar (left) to *Pseudonocardia* sp. (center).

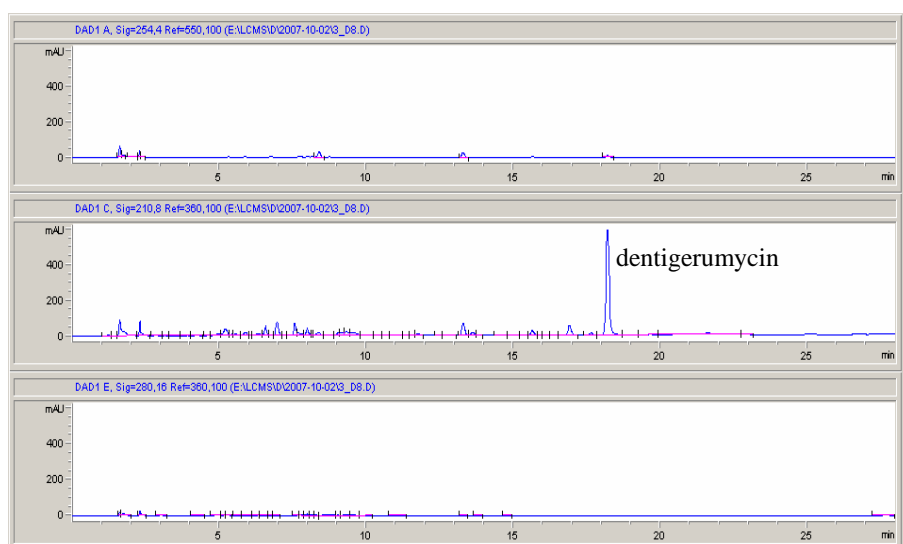

**Fig. 2.** The HPLC trace of the culture of the *Pseudonocardia* strain CC011120-4 showing only one major secondary metabolite peak, dentigerumycin (**1**), at 18.3 min.

**Fig. 3.** NMR spectra of **1**, **6**, **7**, and **8**.

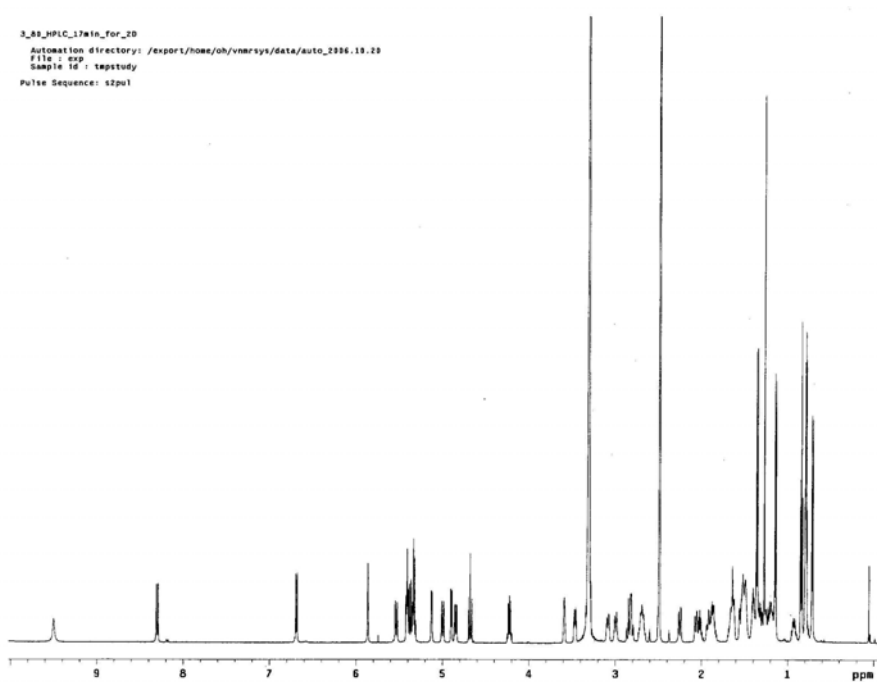

(a) <sup>1</sup>H NMR spectrum of dentigerumycin (**1**).

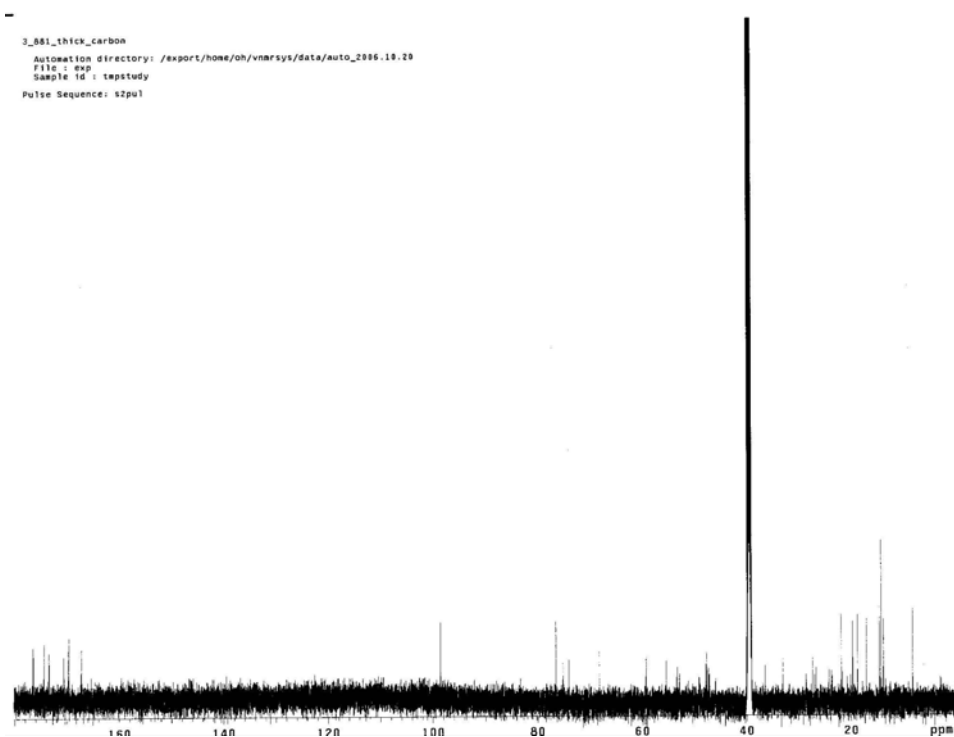

(b) <sup>13</sup>C NMR spectrum of dentigerumycin (**1**).

```

3_R9_HPLC_17min_for_20
Automation directory: /export/home/oh/vnmrsys/data/auto_2006.10.28
File : exp
Sample id : tmpstudy
Pulse Sequence: gCOSY
Solvent: dms
Temp: 26.0 C / 299.1 K
Operator: oh
VNMRS-500 "nmr"

Relax. delay 1.301 sec
Acq. time 0.179 sec
Width 6028.6 Hz
ZD Width 6028.6 Hz
# repetitions
128 increments
OBSERVE F1: 500.726253 MHz
DATA PROCESSING
  Ss, sine bell 0.085 sec
F1 DATA PROCESSING
  Ss, sine bell 0.021 sec
  FT size 2048 x 2048
Total time 25 min, 53 sec

```

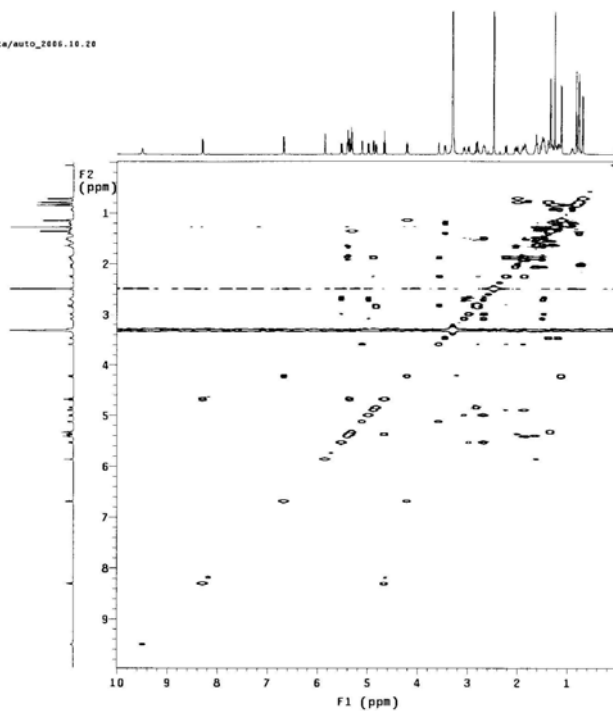

(c) gCOSY NMR spectrum of dentigerumycin (**1**).

```

STANDARD IN OBSERVE - profile
Automation directory: /export/home/oh/vnmrsys/data/auto_2006.10.28
File : exp
Sample id : tmpstudy
Pulse Sequence: gB00E
Solvent: dms
Temp: 26.0 C / 299.1 K
Operator: oh
VNMRS-500 "nmr"

Relax. delay 1.009 sec
Mixing 0.080 sec
Acq. time 0.170 sec
Width 6001.6 Hz
ZD Width 6001.6 Hz
# repetitions
2 x 128 increments
OBSERVE F1: 500.726201 MHz
DATA PROCESSING
  GAUSS apodization 0.079 sec
F1 DATA PROCESSING
  GAUSS apodization 0.031 sec
  FT size 2048 x 2048
Total time 2 hr, 56 min, 3 sec

```

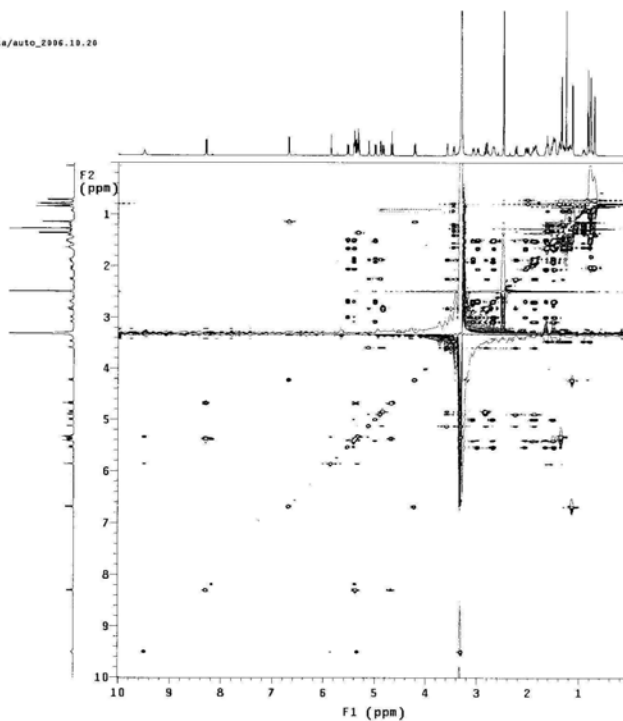

(d) TOCSY NMR spectrum of dentigerumycin (**1**).

```

3_067_ROESY
Automation directory: /export/home/oh/vnmrsys/data/auto_2006.10.28
File: exp
Sample id: tmpstudy
Pulse Sequence: ROESY
Solvent: dmsc
Temp: 25.0 C / 298.1 K
Operator: oh
VNMRS-000 "nar"

Relax. delay 1.000 sec
Mixing 0.200 sec
Acq. time 0.370 sec
Width 6000.0 Hz
2D Width 6000.0 Hz
120 repetitions
2 x 120 increments
OBSERVE F1: 599.7700214 MHz
DATA PROCESSING
Gauss apodization 0.079 sec
F1 DATA PROCESSING
Gauss apodization 0.031 sec
FT size 2048 x 2048
Total time 12 hr, 43 min, 49 sec

```

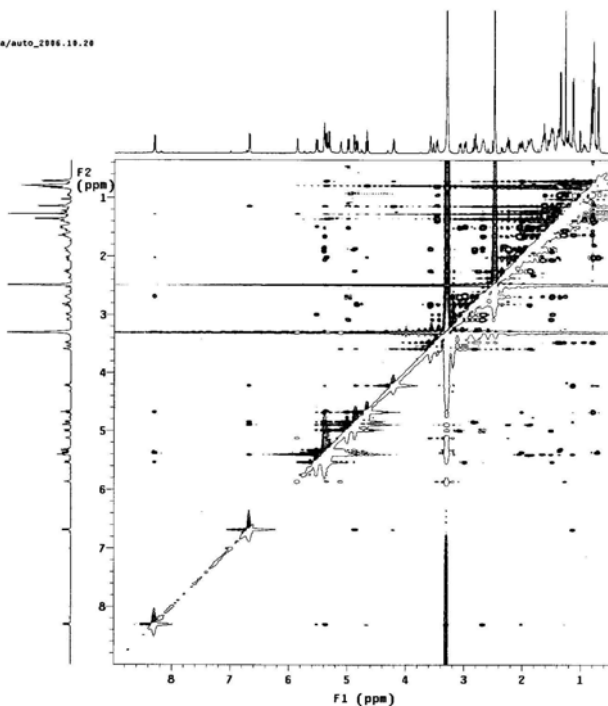

(e) ROESY NMR spectrum of dentigerumycin (**1**).

```

STANDARD 1H OBSERVE - profile
Automation directory: /export/home/oh/vnmrsys/data/auto_2006.10.28
File: exp
Sample id: tmpstudy
Pulse Sequence: gHSQC
Solvent: dmsc
Temp: 26.0 C / 299.1 K
Operator: oh
VNMRS-000 "nar"

Relax. delay 1.301 sec
Acq. time 0.199 sec
Width 8000.0 Hz
2D Width 25641.0 Hz
24 repetitions
2 x 120 increments
OBSERVE F1: 599.7700201 MHz
DECOUPLE C13: 150.8237689 MHz
Power 48 dB
on during acquisition
off during delay
400_HOQ-profile modulated
DATA PROCESSING
Gauss apodization 0.092 sec
F1 DATA PROCESSING
Gauss apodization 0.065 sec
FT size 6596 x 2048
Total time 7 hr, 4 min, 28 sec

```

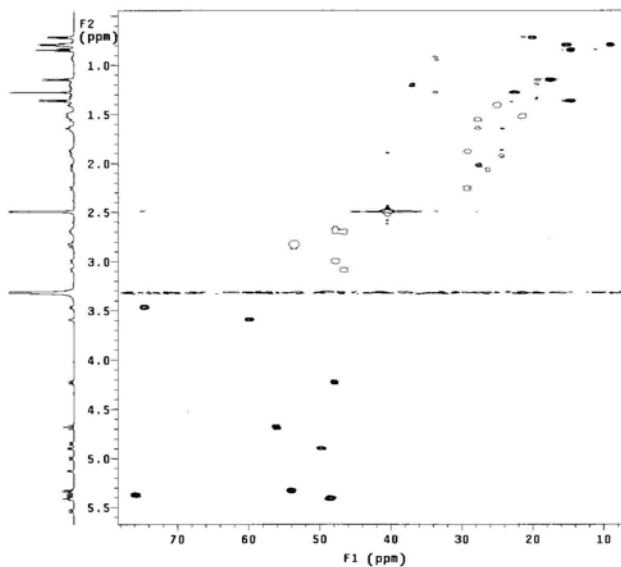

(f) gHSQC NMR spectrum of dentigerumycin (**1**).

3\_881\_thick\_gHMBC  
Automation directory: /export/home/oh/vnmrsys/data/auto\_2006.10.20  
File: esp  
Sample ID: tnpstudy  
Pulse Sequence: gHMBC  
Solvent: dms  
Temp: 26.0 C / 299.1 K  
Operator: oh  
VNAME: esp "mer"  
Relax. delay: 1.000 sec  
Mixing: 0.400 sec  
Acq. time: 0.120 sec  
VirtCh: 6305.6 Hz  
2D Width: 30165.9 Hz  
64 repetitions  
400 increments  
OBSERVE: H1, 500.1326253 MHz  
DATA PROCESSING  
Sine bell: 0.200 sec  
F1 DATA PROCESSING  
Sine bell: 0.400 sec  
F1 size: 4096 x 2560  
Total time: 0 hr, 39 min, 32 sec

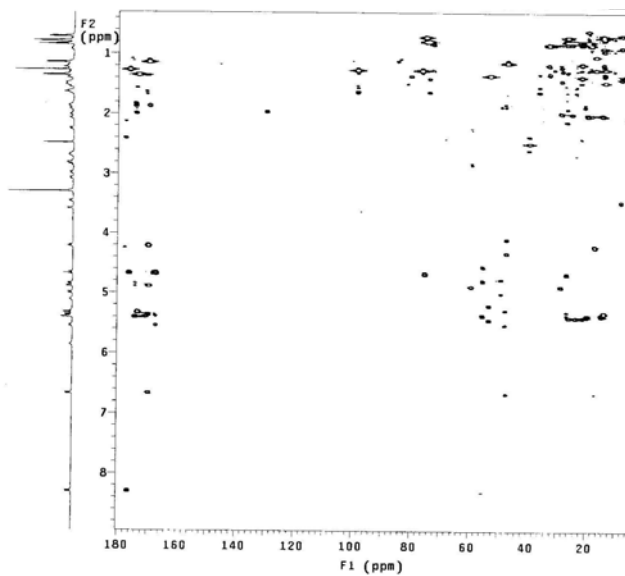

(g) gHMBC NMR spectrum of dentigerumycin (**1**).

3\_881\_S\_MTPA\_ester  
Automation directory: /export/home/oh/vnmrsys/data/auto\_2008.04.24  
File: exp  
Sample id: tapstudy  
Pulse Sequence: s2pul

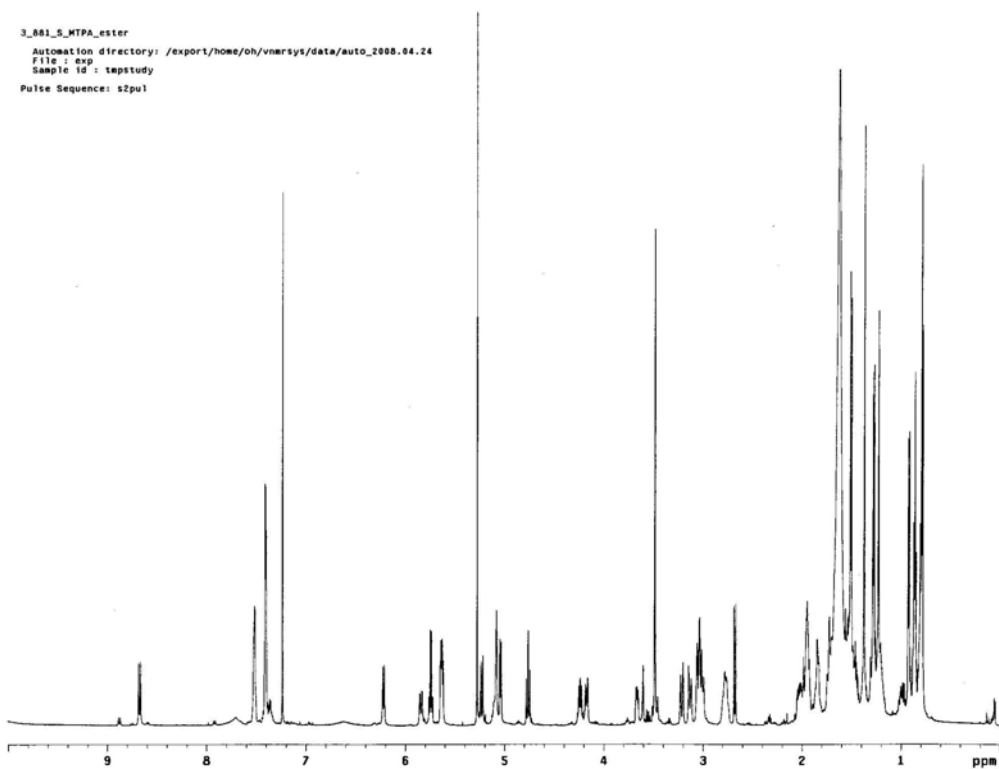

(h)  $^1\text{H}$  NMR spectrum of *S*-MTPA ester (**6**) of dentigerumycin.

3\_881\_S\_MTPA\_ester  
Automation directory: /export/home/oh/vnmrsys/data/auto\_2008.04.24  
File: exp  
Sample id: tapstudy  
Pulse Sequence: gCOSY  
Solvent: cdcl3  
Temp: 24.0 C / 297.1 K  
Operator: Oh  
VNMRS-600 "nar"  
Relax. delay 1.201 sec  
Acq. time 8.170 sec  
Width 6000.0 Hz  
2D Width 6000.0 Hz  
88 repetitions  
128 Increments  
OBSERVE H1: 599.7679764 MHz  
DATA PROCESSING  
Sf. sine bell 0.685 sec  
F1 DATA PROCESSING  
Sf. sine bell 0.621 sec  
F1 size 2648 x 2648  
Total time 3 hr., 24 min., 29 sec

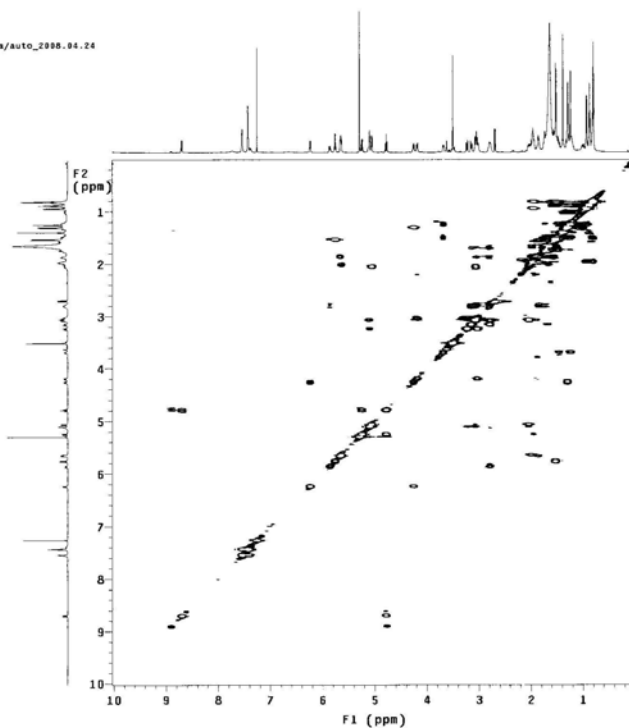

(i) gCOSY NMR spectrum of *S*-MTPA ester (**6**) of dentigerumycin.

```

3_881_S_MTPA_ester
Automation directory: /export/home/oh/vnmrsys/data/auto_2000.04.24
File : exp
Sample id : taptstudy
Pulse Sequence: TOCSY
Solvent: cdcl3
Temp. 24.9 C / 297.1 K
Operator: oh
VNMR5-600 "nar"

Relax. delay 1.000 sec
Mixing 0.055 sec
Acq. time 0.170 sec
Width 6989.6 Hz
2D Width 6989.6 Hz
64 repetitions
2 x 259 increments
OBSERVE H1, 599.767885 MHz
DATA PROCESSING
Gauss apodization 0.079 sec
F1 DATA PROCESSING
Gauss apodization 0.031 sec
F2 size 2040 x 2040
Total time 9 hr, 9 min, 50 sec

```

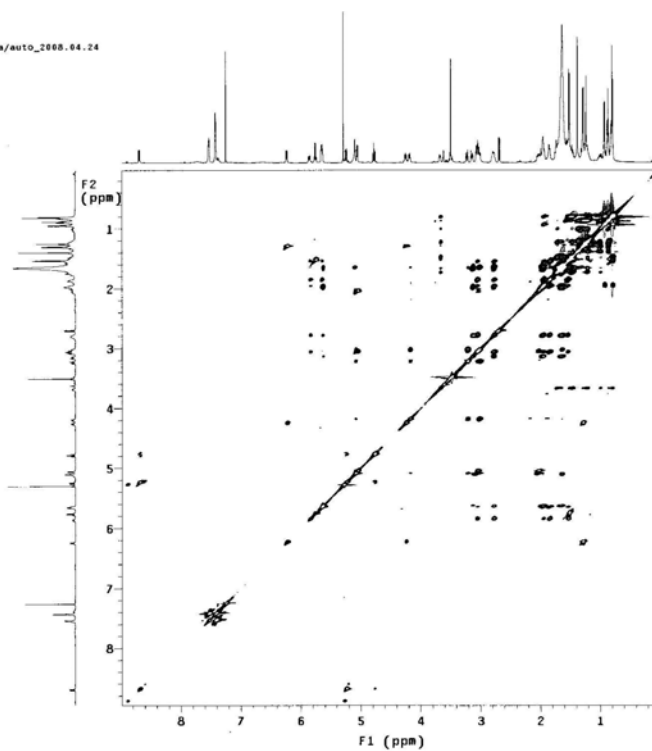

(j) TOCSY NMR spectrum of *S*-MTPA ester (**6**) of dentigerumycin.

```

3_881_R_MTPA_ester
Automation directory: /export/home/oh/vnmrsys/data/auto_2000.04.24
File : /export/home/oh/3_881_R_MTPA_ester.fid
Sample id : taptstudy
Pulse Sequence: s2pul

```

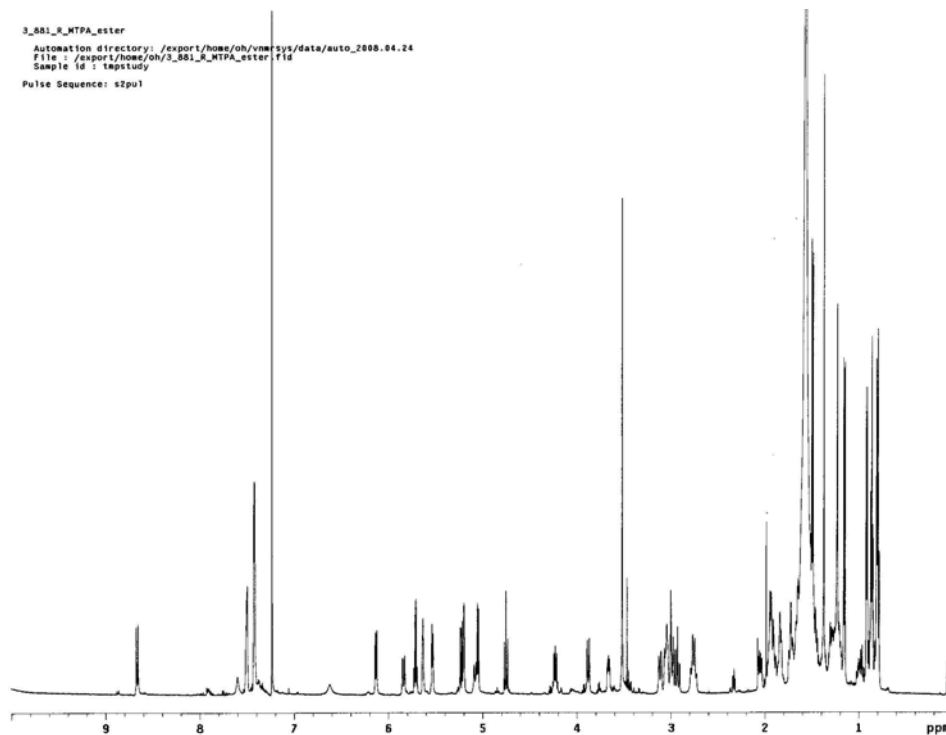

(k)  $^1\text{H}$  NMR spectrum of *R*-MTPA ester (**7**) of dentigerumycin.



3\_881\_R\_MTPA\_ester  
Automation directory: /export/home/oh/vnmrsys/data/auto\_2008.04.24  
File : exp  
Sample id : tapstudy  
Pulse Sequence: gCOSY  
Solvent: cdcl3  
Temp: 24.6 C / 297.1 K  
Operator: oh  
VIEWS=666 "nar"  
Relax. delay 1.381 sec  
Acq. time 6.176 sec  
Width 6609.6 Hz  
ZD width 6609.6 Hz  
64 repetitions  
128 increments  
OBSERVE H1, 599.7679888 MHz  
DATA PROCESSING  
Sq. sine bell 0.385 sec  
F1 DATA PROCESSING  
Sq. sine bell 0.321 sec  
F1 size 2048 x 2048  
Total time 3 hr, 24 min, 29 sec

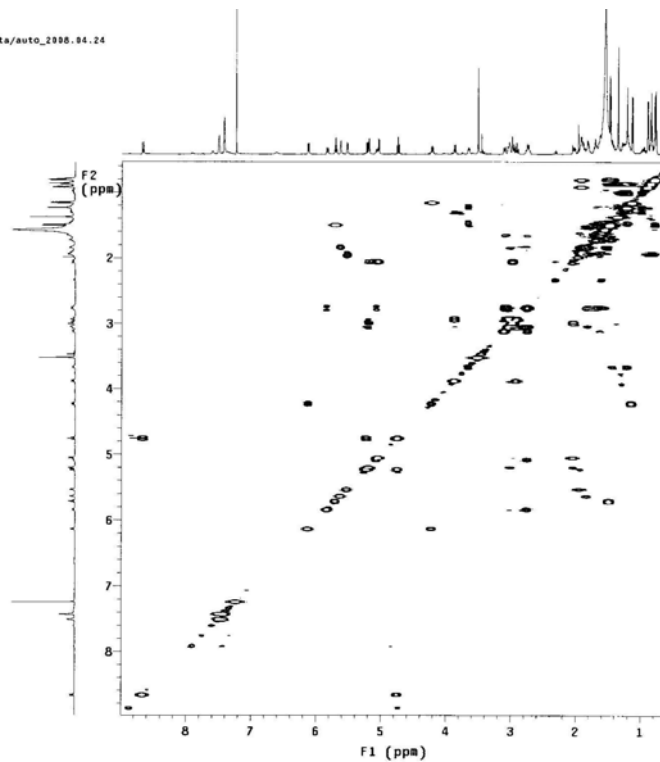

(l) gCOSY NMR spectrum of *R*-MTPA ester (**7**) of dentigerumycin.

3\_881\_R\_MTPA\_ester  
Automation directory: /export/home/oh/vnmrsys/data/auto\_2008.04.24  
File : exp  
Sample id : tapstudy  
Pulse Sequence: gTOCSY  
Solvent: cdcl3  
Temp: 24.6 C / 297.1 K  
Operator: oh  
VIEWS=666 "nar"  
Relax. delay 1.866 sec  
Mixing 6.000 sec  
Acq. time 6.176 sec  
Width 6609.6 Hz  
ZD width 6609.6 Hz  
64 repetitions  
2 x 256 increments  
OBSERVE H1, 599.7679888 MHz  
DATA PROCESSING  
Gauss apodization 0.679 sec  
F1 DATA PROCESSING  
Gauss apodization 0.631 sec  
F1 size 2048 x 2048  
Total time 5 hr, 9 min, 58 sec

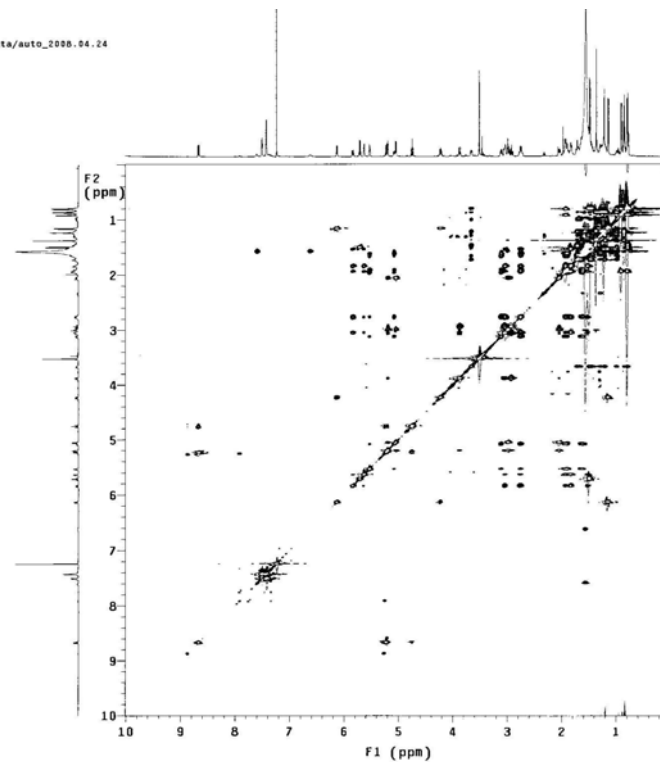

(m) TOCSY NMR spectrum of *R*-MTPA ester (**7**) of dentigerumycin.

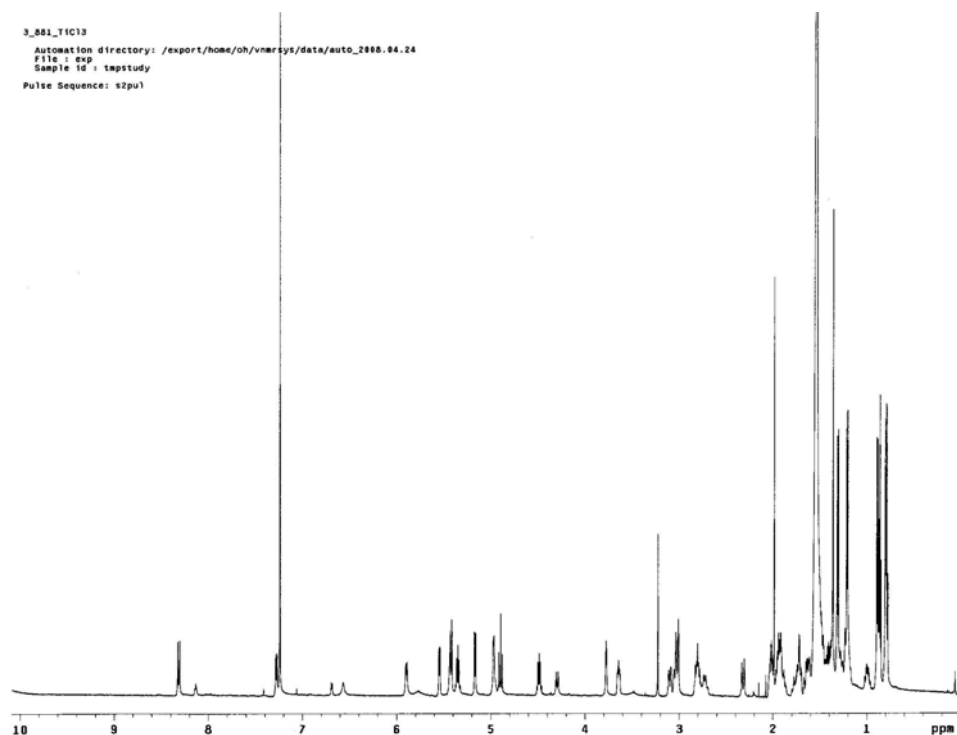

(n)  $^1\text{H}$  NMR spectrum of 15-*N*-deoxydentigerumycin (**8**) of dentigerumycin.

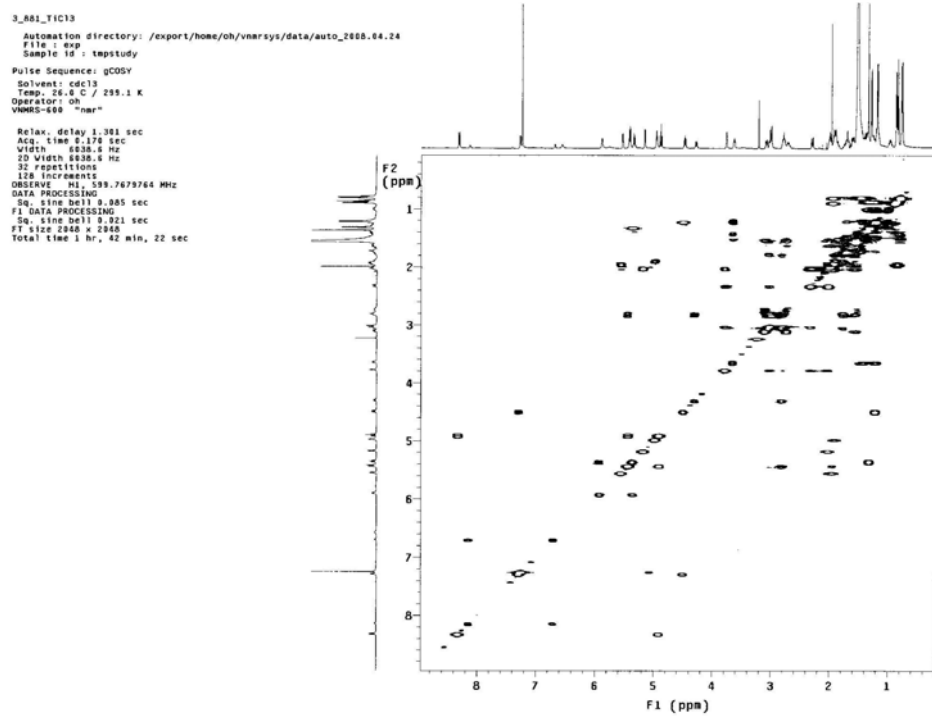

(o) gCOSY NMR spectrum of 15-*N*-deoxydentigerumycin (**8**) of dentigerumycin.

3\_881\_TIC13  
Automation directory: /export/home/oh/vnmrsys/data/auto\_2885.04.24  
File: exp  
Sample id: tmpstudy  
Pulse Sequence: #005V  
Solvent: cdcl3  
Temp: 26.6 C / 299.1 K  
Operator: oh  
VIEWS: use "nmr"  
Relax. delay 1.800 sec  
Mixing 0.000 sec  
Acq. time 0.170 sec  
Width 6030.6 Hz  
ZD Width 6030.6 Hz  
64 repetitions  
2 x 256 increments  
OBSERVE H1, 500.7679764 MHz  
DATA PROCESSING  
Gauss apodization 0.078 sec  
F1 DATA PROCESSING  
Gauss apodization 0.031 sec  
FT size 2048 x 2048  
Total time 3 hr, 9 min, 27 sec

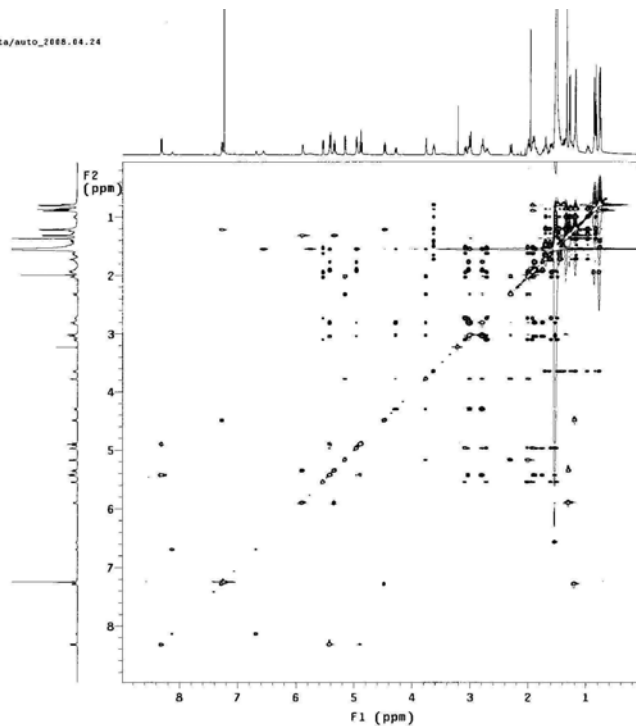

(p) TOCSY NMR spectrum of 15-*N*-deoxydentigerumycin (**8**) of dentigerumycin.

3\_881\_TIC13  
Automation directory: /export/home/oh/vnmrsys/data/auto\_2008.04.24  
File: /export/home/oh/3\_881\_TIC13\_HSQC.f10  
Sample id: tmpstudy  
Pulse Sequence: gHSQC  
Solvent: cdcl3  
Temp: 26.0 C / 299.1 K  
Operator: oh  
File: 3\_881\_TIC13\_HSQC  
VIEWS: use "nmr"  
Relax. delay 1.301 sec  
Acq. time 0.199 sec  
Width 6000.6 Hz  
ZD Width 15000.1 Hz  
64 repetitions  
2 x 100 increments  
OBSERVE H1, 500.7679764 MHz  
DECOUPLE C13, 150.8192822 MHz  
Power 40 dB  
on during acquisition  
off during delay  
V40 NON-proton modulated  
DATA PROCESSING  
Gauss apodization 0.092 sec  
F1 DATA PROCESSING  
Gauss apodization 0.006 sec  
FT size 4096 x 2048  
Total time 5 hr, 31 min, 58 sec

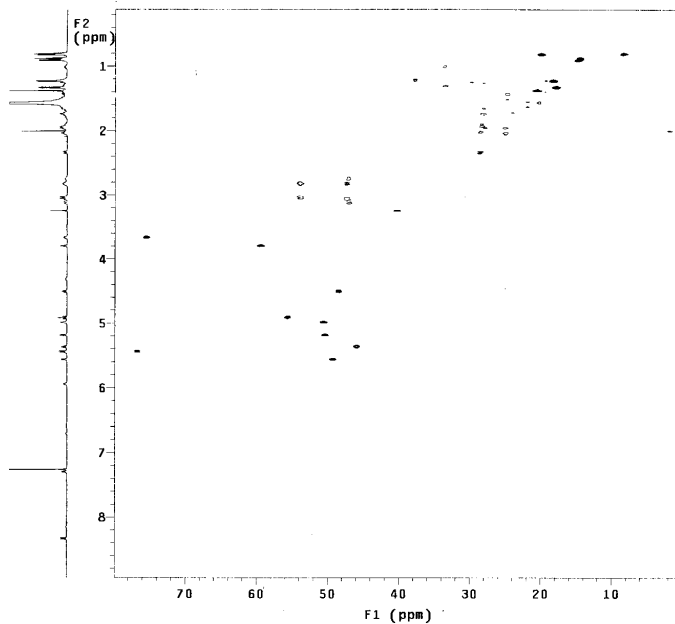

(q) gHSQC NMR spectrum of 15-*N*-deoxydentigerumycin (**8**) of dentigerumycin.

3\_881\_T1C13

Automation directory: /export/home/oh/vnmrSYS/data/auto\_2008.04.24  
File: /export/home/oh/3\_881\_T1C13\_HMBC.fid

Pulse Sequence: gHMBC  
Solvent: cdcl3  
Temp: 28.0 C / 299.1 K  
Operator: oh  
File: 3\_881\_T1C13\_HMBC  
VNMRS-819 "nmr"

Relax. delay 1.000 sec  
Mixing 0.350 sec  
Acq. time 0.128 sec  
Width 6009.6 Hz  
2D Width 28653.3 Hz  
128 repetitions  
189 increments  
OBSERVE H1, 599.7679764 MHz  
DATA PROCESSING  
Sine bell 0.064 sec  
F1 DATA PROCESSING  
Sine bell 0.003 sec  
FT size 4096 x 2048  
Total time 4 hr, 19 min, 3 sec

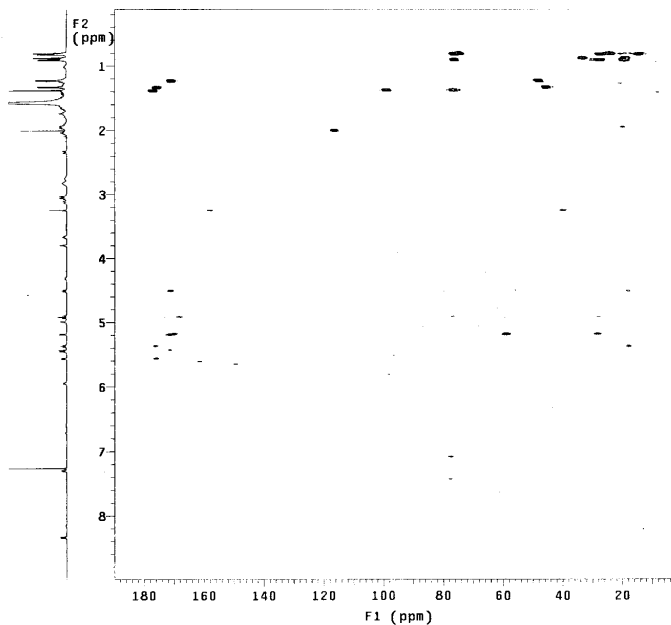

(r) gHMBC NMR spectrum of 15-*N*-deoxydentigerumycin (**8**) of dentigerumycin.

3\_881\_T1C13

Automation directory: /export/home/oh/vnmrSYS/data/auto\_2008.04.24  
File: /export/home/oh/3\_881\_T1C13\_ROESY.fid

Sample id: tapstudy  
Pulse Sequence: ROESY  
Solvent: cdcl3  
Temp: 28.0 C / 299.1 K  
Operator: oh  
File: 3\_881\_T1C13\_ROESY  
VNMRS-819 "nmr"

Relax. delay 1.000 sec  
Mixing 0.239 sec  
Acq. time 0.170 sec  
Width 6009.6 Hz  
2D Width 6009.6 Hz  
32 repetitions  
2 x 139 increments  
OBSERVE H1, 599.7679764 MHz  
DATA PROCESSING  
Gauss apodization 0.079 sec  
F1 DATA PROCESSING  
Gauss apodization 0.020 sec  
FT size 2048 x 2048  
Total time 2 hr, 30 min, 8 sec

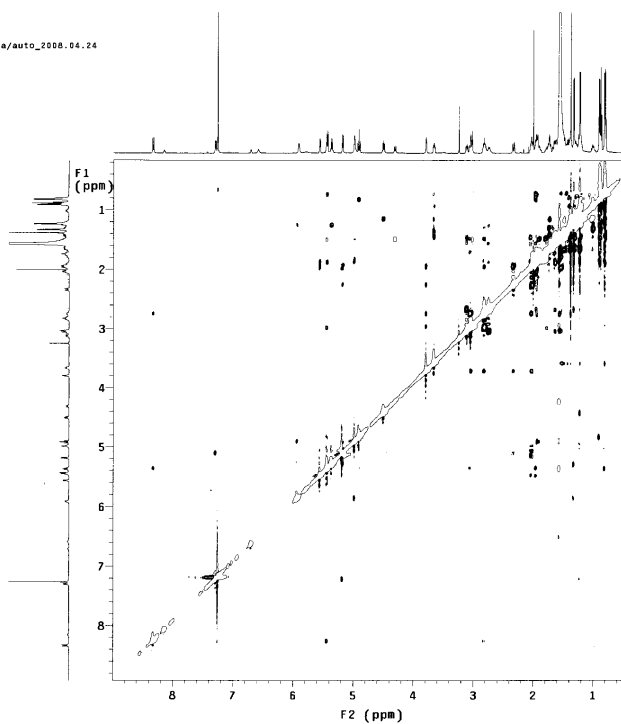

(s) ROESY NMR spectrum of 15-*N*-deoxydentigerumycin (**8**) of dentigerumycin.

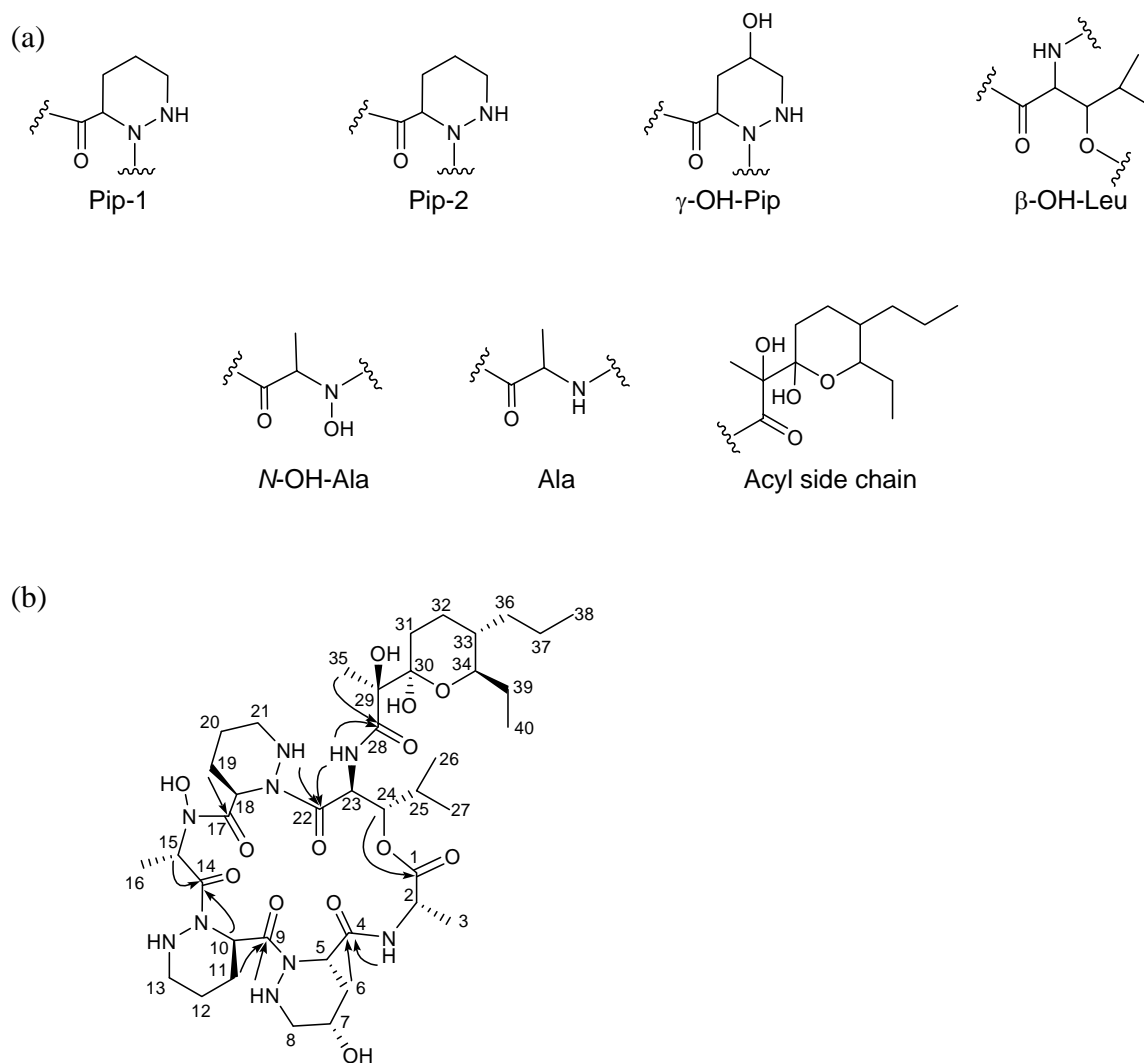

**Fig. 4.** Determination of the planar structure of dentigerumycin (**1**). (a) The partial structures of dentigerumycin (**1**) identified by gCOSY, TOCSY, HSQC, and HMBC NMR spectral analysis. (b) Key HMBC correlations (arrows) in dentigerumycin (**1**) secure the connectivity of these partial structures.

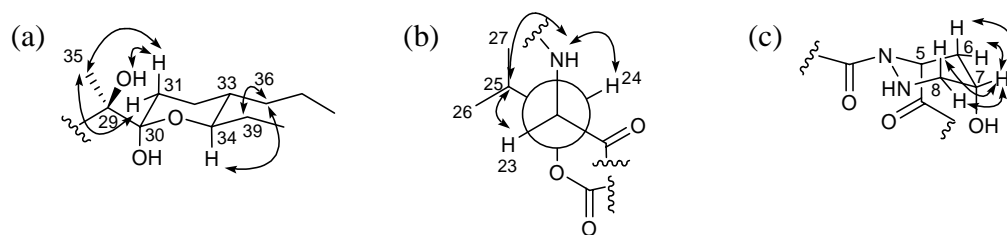

**Fig. 5.** Determination of relative configurations of dentigerumycin (**1**). (a) Key ROESY correlations in the acyl side chain. (b) C-23-C-24 rotamer with key ROESY correlations. The anti-relationship between H-23 and H-24 was established by  $J_{H23H24}$  (11.5 Hz)<sup>2</sup> (c) Key ROESY correlations in  $\gamma$ -OH-Pip. The  $^1\text{H}$ - $^1\text{H}$  coupling constants of the  $\gamma$ -OH-Pip unit were compared with the literature values.<sup>3</sup>

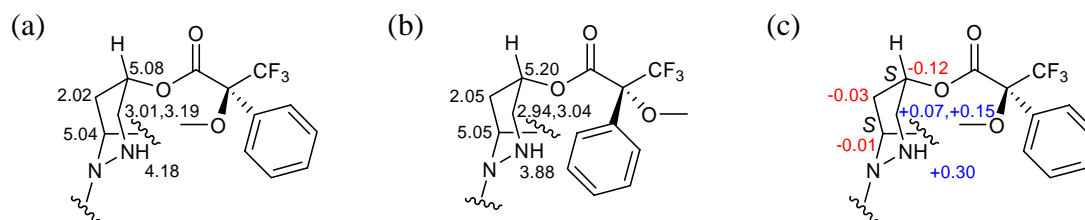

**Fig. 6.** The modified Mosher method analysis of **1**.  $^1\text{H}$  chemical shifts of  $\gamma$ -hydroxy piperazic acid (a) in *S*-MTPA ester (**6**) and (b) in *R*-MTPA ester (**7**) in  $\text{CDCl}_3$ . (c)  $\Delta\delta_{S-R}$  values in ppm of  $\gamma$ -hydroxy piperazic acid ppm for the *S*- and *R*-MTPA esters of dentigerumycin in  $\text{CDCl}_3$ , determining *S* configuration of the secondary alcohol.

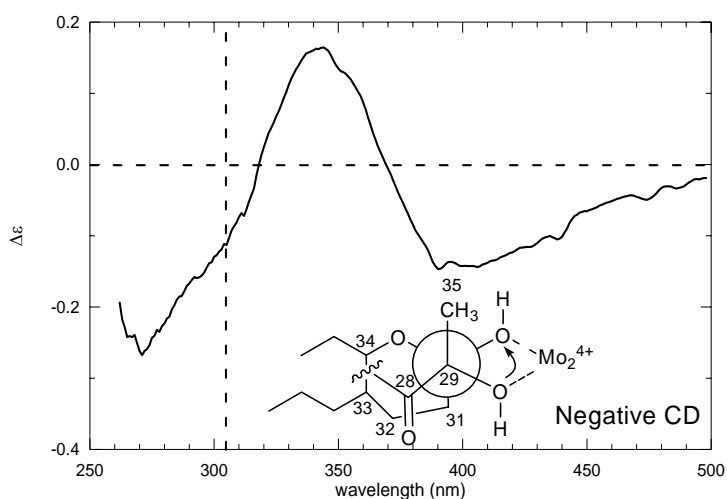

**Fig. 7.** Induced CD spectrum by dentigerumycin and  $\text{Mo}_2(\text{OAc})_4$  complex. The negative sign at 305 nm determines the absolute configurations of 29*S* and 30*R* based on the preferred conformation of the complex of the diol and the molybdenum ions shown with the spectrum.

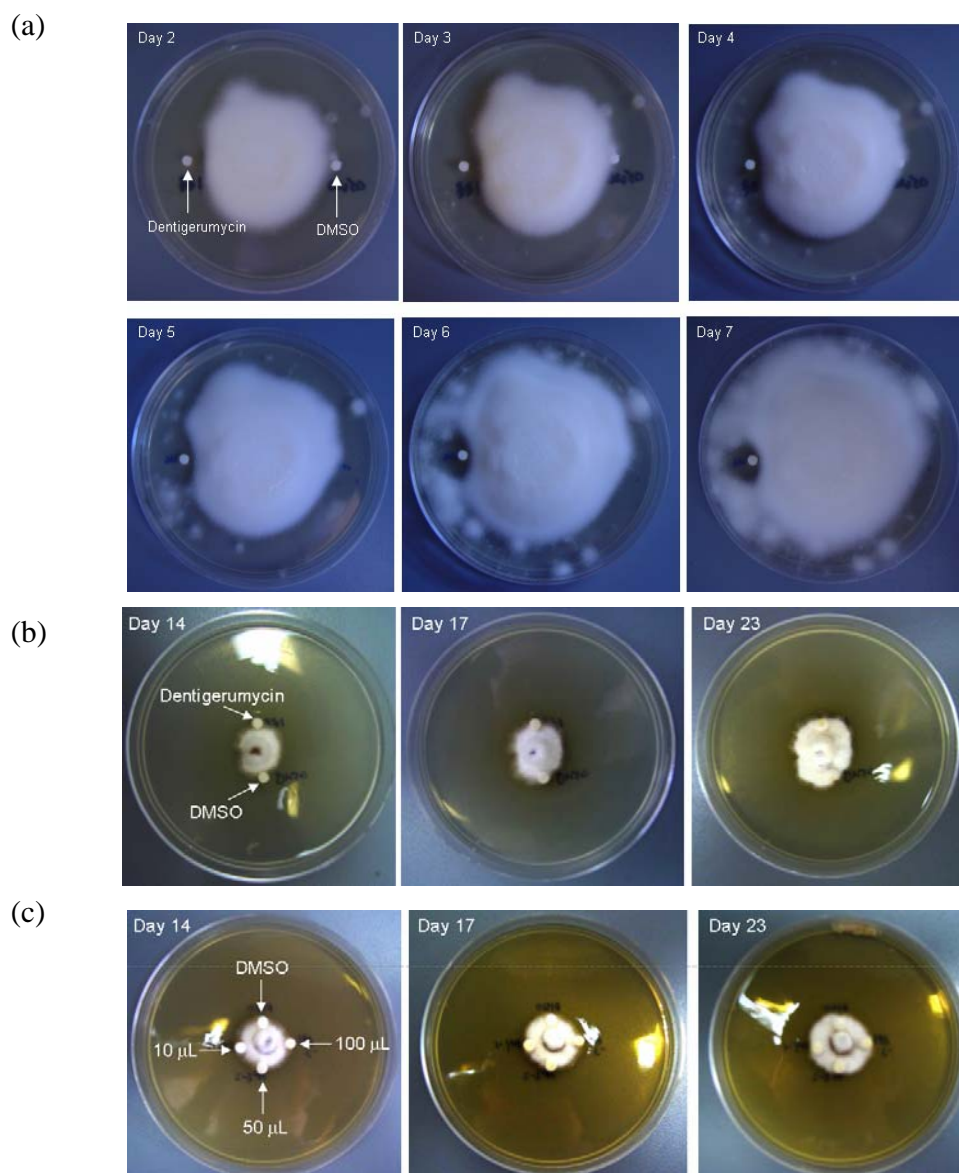

**Fig. 8.** Plate antifungal assays. (a) An example of a plate antifungal assay progress against *Escovopsis* CC011120-4. 10  $\mu$ L of 5 mg/mL pure dentigerumycin and DMSO solution were applied to each disk. Dentigerumycin clearly inhibits the growth of *Escovopsis* CC011120-4. (b) An example of a plate antifungal assay progress against the cultivar fungus CC011120-4. 10  $\mu$ L of 5 mg/mL pure dentigerumycin and DMSO solution were applied to each disk. Dentigerumycin does not inhibit the growth of the cultivar fungus CC011120-4. (c) An example of a plate antifungal assay progress against the cultivar fungus CC011120-4 with different doses. 10, 50, and 100  $\mu$ L of 5 mg/mL (in DMSO) pure dentigerumycin (**1**) and 100  $\mu$ L of DMSO were applied to each disk. Dentigerumycin does not inhibit the growth of the cultivar fungus CC011120-4 even at higher doses.

## Supplementary Tables

**Table 1.** NMR Spectral Data for dentigerumycin (**1**) in DMSO-*d*<sub>6</sub>.

| C/H     | $\delta_{\text{H}}$ | mult ( <i>J</i> in Hz) | $\delta_{\text{C}}$ |                 |
|---------|---------------------|------------------------|---------------------|-----------------|
| 1       |                     |                        | 169.8               | C               |
| 2       | 4.22                | m                      | 47.7                | CH              |
| 2-NH    | 6.69                | d (8.5)                |                     |                 |
| 3       | 1.15                | d (7.5)                | 17.1                | CH <sub>3</sub> |
| 4       |                     |                        | 169.6               | C               |
| 5       | 4.90                | dd (7.5, 1.5)          | 49.1                | CH              |
| 6a      | 2.26                | br. d (13.0)           | 28.6                | CH <sub>2</sub> |
| 6b      | 1.88                | m                      |                     |                 |
| 7       | 3.60                | br. m                  | 59.3                | CH              |
| 7-OH    | 5.12                | d (5.0)                |                     |                 |
| 8       | 2.84                | m                      | 52.8                | CH <sub>2</sub> |
| 8-NH    | 4.85                | dd (12.0, 2.5)         |                     |                 |
| 9       |                     |                        | 174.4               | C               |
| 10      | 5.42                | dd (6.5, 3.0)          | 47.7                | CH              |
| 11a     | 1.92                | m                      | 23.7                | CH <sub>2</sub> |
| 11b     | 1.85                | m                      |                     |                 |
| 12      | 1.51                | m                      | 20.7                | CH <sub>2</sub> |
| 13a     | 3.09                | br. d (13.0)           | 46.0                | CH <sub>2</sub> |
| 13b     | 2.70                | m                      |                     |                 |
| 13-NH   | 5.00                | dd (12.5, 1.5)         |                     |                 |
| 14      |                     |                        | 173.4               | C               |
| 15      | 5.33                | q (7.5)                | 53.2                | CH              |
| 15-N-OH | 9.50                | s                      |                     |                 |
| 16      | 1.37                | d (7.5)                | 13.8                | CH <sub>3</sub> |
| 17      |                     |                        | 170.6               | C               |
| 18      | 5.40                | dd (5.5, 1.5)          | 47.8                | CH              |
| 19a     | 2.07                | br. d (12.5)           | 25.7                | CH <sub>2</sub> |
| 19b     | 1.66                | m                      |                     |                 |
| 20      | 1.50                | m                      | 20.1                | CH <sub>2</sub> |
| 21a     | 3.00                | br. d (12.5)           | 47.3                | CH <sub>2</sub> |
| 21b     | 2.68                | m                      |                     |                 |
| 21-NH   | 5.53                | dd (12.5, 1.5)         |                     |                 |
| 22      |                     |                        | 167.3               | C               |
| 23      | 4.68                | dd (11.0, 1.0)         | 55.4                | CH              |
| 23-NH   | 8.30                | d (11.0)               |                     |                 |
| 24      | 5.37                | dd (11.0, 1.5)         | 75.2                | CH              |
| 25      | 2.03                | m                      | 26.7                | CH              |
| 26      | 0.80                | d (7.0)                | 14.6                | CH <sub>3</sub> |
| 27      | 0.72                | d (7.0)                | 19.7                | CH <sub>3</sub> |
| 28      |                     |                        | 176.4               | C               |
| 29      |                     |                        | 76.5                | C               |
| 29-OH   | 5.34                | s                      |                     |                 |
| 30      |                     |                        | 98.6                | C               |
| 30-OH   | 5.86                | s                      |                     |                 |
| 31a     | 1.64                | m                      | 27.0                | CH <sub>2</sub> |
| 31b     | 1.55                | m                      |                     |                 |
| 32      | 1.63                | m                      | 23.8                | CH <sub>2</sub> |
| 33      | 1.20                | m                      | 36.5                | CH              |
| 34      | 3.47                | m                      | 74.0                | CH              |
| 35      | 1.27                | s                      | 21.9                | CH <sub>3</sub> |
| 36a     | 1.23                | m                      | 33.1                | CH <sub>2</sub> |
| 36b     | 0.94                | m                      |                     |                 |
| 37a     | 1.33                | m                      | 19.7                | CH <sub>2</sub> |
| 37b     | 1.17                | m                      |                     |                 |
| 38      | 0.85                | t (7.0)                | 14.3                | CH <sub>3</sub> |
| 39      | 1.40                | m                      | 24.3                | CH <sub>2</sub> |
| 40      | 0.80                | t (7.5)                | 8.2                 | CH <sub>3</sub> |

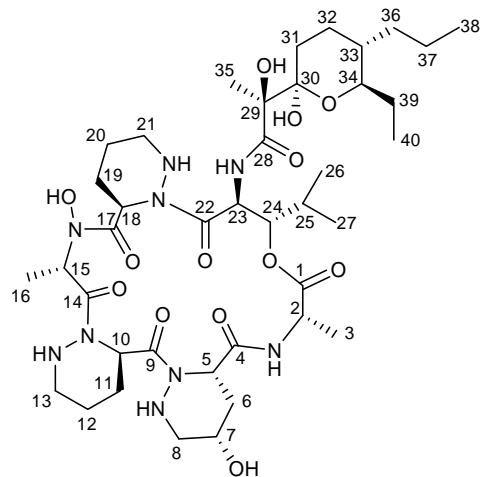



**Table 2.** NMR Spectral Data for reduction product (15-*N*-deoxydentigerumycin, **8**) of dentigerumycin in CDCl<sub>3</sub>.

| C/H   | $\delta_{\text{H}}$ | mult ( <i>J</i> in Hz) | $\delta_{\text{C}}$ |                 |
|-------|---------------------|------------------------|---------------------|-----------------|
| 1     |                     |                        | 171.0               | C               |
| 2     | 4.49                | dq (8.5, 7.0)          | 48.5                | CH              |
| 2-NH  | 7.28                | d (8.5)                |                     |                 |
| 3     | 1.21                | d (7.0)                | 18.4                | CH <sub>3</sub> |
| 4     |                     |                        | 171.0               | C               |
| 5     | 5.17                | br. d (7.0)            | 50.4                | CH              |
| 6a    | 2.32                | br. d (15.0)           | 28.5                | CH <sub>2</sub> |
| 6b    | 2.01                | m                      |                     |                 |
| 7     | 3.78                | br. m                  | 59.4                | CH              |
| 8a    | 3.02                | m                      | 53.9                | CH <sub>2</sub> |
| 8b    | 2.80                | m                      |                     |                 |
| 8-NH  | 4.30                | br. d (13.0)           |                     |                 |
| 9     |                     |                        | 175.9               | C               |
| 10    | 5.54                | dd (7.0, 1.5)          | 49.3                | CH              |
| 11a   | 2.02                | m                      | 25.1                | CH <sub>2</sub> |
| 11b   | 1.97                | m                      |                     |                 |
| 12a   | 1.61                | m                      | 22.0                | CH <sub>2</sub> |
| 12b   | 1.52                | m                      |                     |                 |
| 13a   | 3.10                | br. d (13.0)           | 47.0                | CH <sub>2</sub> |
| 13b   | 2.73                | m                      |                     |                 |
| 13-NH | 4.96                | m                      |                     |                 |
| 14    |                     |                        | 171.7               | C               |
| 15    | 5.35                | dq (8.0, 7.5)          | 45.9                | CH              |
| 15-NH | 5.92                | d (8.0)                |                     |                 |
| 16    | 1.31                | d (7.5)                | 18.0                | CH <sub>3</sub> |
| 17    |                     |                        | 171.4               | C               |
| 18    | 4.97                | m                      | 50.6                | CH              |
| 19    | 1.90                | m                      | 28.4                | CH <sub>2</sub> |
| 20    | 1.72                | m                      | 24.1                | CH <sub>2</sub> |
| 21a   | 3.04                | m                      | 47.4                | CH <sub>2</sub> |
| 21b   | 2.81                | m                      |                     |                 |
| 21-NH | 5.42                | m                      |                     |                 |
| 22    |                     |                        | 168.4               | C               |
| 23    | 4.90                | dd (11.0, 1.0)         | 55.6                | CH              |
| 23-NH | 8.31                | d (11.0)               |                     |                 |
| 24    | 5.42                | m                      | 76.7                | CH              |
| 25    | 1.93                | m                      | 27.9                | CH              |
| 26    | 0.89                | d (6.5)                | 14.8                | CH <sub>3</sub> |
| 27    | 0.80                | d (6.5)                | 20.9                | CH <sub>3</sub> |
| 28    |                     |                        | 177.0               | C               |
| 29    |                     |                        | 76.9                | C               |
| 30    |                     |                        | 99.2                | C               |
| 31a   | 1.72                | m                      | 28.2                | CH <sub>2</sub> |
| 31b   | 1.64                | m                      |                     |                 |
| 32    | 1.70                | m                      | 24.1                | CH <sub>2</sub> |
| 33    | 1.22                | m                      | 37.8                | CH              |
| 34    | 3.64                | m                      | 75.4                | CH              |
| 35    | 1.36                | s                      | 20.6                | CH <sub>3</sub> |
| 36a   | 1.28                | m                      | 33.6                | CH <sub>2</sub> |
| 36b   | 0.99                | m                      |                     |                 |
| 37a   | 1.38                | m                      | 19.4                | CH <sub>2</sub> |
| 37b   | 1.20                | m                      |                     |                 |
| 38    | 0.86                | t (7.0)                | 14.6                | CH <sub>3</sub> |
| 39    | 1.50                | m                      | 24.8                | CH <sub>2</sub> |
|       | 1.43                | m                      |                     |                 |
| 40    | 0.79                | t (7.5)                | 8.6                 | CH <sub>3</sub> |

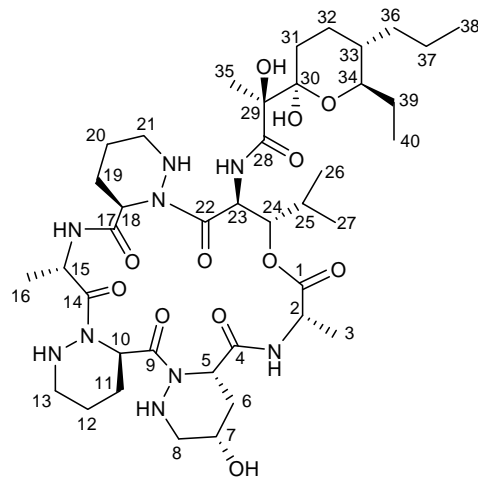

## Supplementary Methods

### General chemical analysis procedures

Optical rotation was measured on a Jasco P-2000 polarimeter with a 5 cm cell. IR spectra were obtained in a Perkin-Elmer 1600 FT-IR spectrometer. CD spectra were collected in an AVIV model 202 CD spectrometer with a 0.5 cm long cuvette. <sup>1</sup>H and two dimensional NMR spectra were acquired in a Varian Inova 600 MHz spectrometer. <sup>13</sup>C NMR spectra were collected on a Varian Inova 150 MHz spectrometer. LC/MS analysis was performed on an Agilent 1200 Series HPLC / 6130 Series mass spectrometer. High resolution mass spectra were obtained on a Waters Micromass Q-ToF Ultima ESI-TOF mass spectrometer.

### Isolations of microbial symbionts from *Apterostigma dentigerum* colony CC011120-04

The colony was collected in 2001 in Gamboa, Panama, and isolates of the mutualistic fungus, the *Escovopsis* parasite, and the *Pseudonocardia* actinobacterium were obtained. The mutualistic fungus was isolated by applying small tufts of fungus mycelium on Potato Dextrose Agar (PDA; 39 g/L) and subculturing until a pure culture of the symbiont was obtained. *Escovopsis* was obtained by placing larger fungus garden fragments on PDA allowing the parasite to grow and sporulate from the garden piece. Pure cultures were obtained by transferring *Escovopsis* spores to new plates containing PDA. The *Pseudonocardia* isolate was obtained by scraping bacteria from the ant cuticle onto chitin agar plates containing antifungals (nystatin 10,000 units/mL and cycloheximide 5% w/v), and subsequently sub-cultured onto yeast malt extract agar (YMEA; 10 g yeast extract, 4 g dextrose, 10 g malt extract and 20 g agar per liter of medium) with antifungals (concentrations as above).<sup>1</sup>

### Cultivation of *Pseudonocardia* sp. CC011120-4

The strain CC011120-4 was initially cultured on the medium YMEA (4 g yeast extract, 10 g malt extract, 4 g glucose, and 20 g agar per 1 L of deionized water) agar plates for 7 days. The bacterial cells were scraped from the plate and transferred to a 125 mL Erlenmeyer flask containing 25 mL of YMEA liquid medium (4 g yeast extract, 10 g malt extract, and 4 g glucose per 1 L of deionized water). The liquid culture was incubated at 30 °C with shaking at 250 rpm for 7 days. The 20 mL of the YMEA culture was inoculated to 200 mL of YMEA in 500 mL Erlenmeyer flask. After incubating the 200 mL culture at 30 °C with shaking at 250 rpm for 5 days, 25 mL of the culture was transferred to 1 L of YMEA medium in 4 L Erlenmeyer flask (8 L). The 8 L of YMEA culture was also incubated at 30 °C with shaking at 250 rpm for 14 days.

### Extraction and isolation of dentigerumycin (1)

The whole culture (8 L) was extracted with 12 L of ethyl acetate (EtOAc) twice. The EtOAc layer was separated from the aqueous phase with a fractionating funnel. After fractionation, residual amount of water in the organic layer was removed by adding sodium sulfate anhydrous. The EtOAc was removed by rotavap and dry crude extract material was obtained. The crude material was resuspended in dichloromethane (DCM) / methanol (MeOH) 1:1 solvent and celite was added to the mixture. The celite-extract mixture was dried *in vacuo* and the dry material was loaded on 2 g of a pre-packed C<sub>18</sub> Sepak resin. The crude extract was fractionated by eluting with a step gradient of water, MeOH, and DCM combinations. The 80% MeOH fraction was most active in inhibition of the parasitic fungus *Escovopsis* strain (CC011120-4). The fraction was subsequently purified by reversed-phase HPLC (Agilent 1100 Series HPLC system, Alltech semipreparative column C<sub>18</sub>, 10 mm × 250 mm, 2 mL/min, UV 210 nm detection) with the isocratic solvent mixture 80% CH<sub>3</sub>CN in water. Dentigerumycin (**1**) was eluted at 16.4 min. The overall yield of the pure dentigerumycin through extraction and isolation is approximately 3 mg / L.

**Dentigerumycin (1):**  $[\alpha]_D^{24}$  -15 (c 0.59, CHCl<sub>3</sub>) ; IR (neat)  $\nu_{\max}$  3372, 2936, 1752, 1648, 1503, 1452, 1322, 1249, 1192 cm<sup>-1</sup>; NMR spectral data, see **Supplementary Table 1**; HR-ESI-TOFMS  $[M+Na]^+$   $m/z$  at 904.4775, calcd  $[M+Na]^+$  at 904.4756.

### Determination of the absolute configuration of the amino acid units in dentigerumycin

1.2 mg of dentigerumycin was hydrolyzed in 0.5 mL of 6 N HCl at 115 °C for 1 h, the HCl was removed under vacuum. The dry material was resuspended in 0.5 mL of water and dried three times to remove residual acid. The hydrolysate was purified by column chromatography using a C<sub>18</sub> Sepak column (0.5 g). The free amino acids were eluted with 10 % CH<sub>3</sub>CN in water. The purified hydrolysate with the free amino acids was divided into two portions and dissolved in 1 N NaHCO<sub>3</sub> (100 μL). 50 μL of 10 mg/mL L-FDLA (**2**) and D-FDLA (**3**)<sup>4</sup> were added to the solution and the reaction mixtures were heated at 80 °C for 3 min. The reaction was quenched by neutralization with 50 μL of 2 N HCl. Aqueous 50 % CH<sub>3</sub>CN (300 μL) was added to the solution to dissolve the products, which were analyzed by LC/MS with a gradient solvent system from 20 % to 70 % CH<sub>3</sub>CN (0.1% formic acid) over 50 min (Agilent 1200 Series HPLC / 6130 Series mass spectrometer, Phenomenex C<sub>18</sub>(2) 5 μm, 4.6 mm × 100 mm, 0.7 mL/min flow rate). The L-FDLA and D-FDLA derivatives of two piperazic acid units were eluted at retention time 22.0 and 24.8 min, respectively. Both piperazic acid units in **1** were determined to have *R* configuration based on the retention times of the L-FDLA derivatives of synthetic *R*- and *S*-piperazic acids (**4** and **5**) (*R*: 22.3 min and *S*: 25.0 min). Alanine was eluted at 23.5 and 27.4 min with L-FDLA and

D-FDLA derivatizations, respectively, establishing its *S* configuration. The products derived from  $\beta$ -hydroxy leucine unit were detected at 23.2 and 29.5 min for L and D-FDLA derivatization, determining *S* configuration at its  $\alpha$ -carbon chiral center. The L-FDLA and D-FDLA derivatives of  $\gamma$ -hydroxy piperazine acid unit were eluted at 19.6 min and 18.1 min but the absolute configuration could not be established only with the Marfey analysis. The products originated from *N*-hydroxy alanine were not detected.

### ***S*- and *R*-MTPA esters (6 and 7) of dentigerumycin**

Dry dentigerumycin (0.8 mg) was prepared in two separate vials and several dry crystals of dimethylaminopyridine were added to the two reaction vials. The mixture was dissolved in freshly distilled dry pyridine (2 mL) and stirred for 15 min under argon at room temperature. 50  $\mu$ L of *R*- and *S*-MTPA chloride (5.36  $\mu$ mol/ $\mu$ L) were added respectively to the separate reaction vials and the reaction mixtures were stirred at room temperature for 1 h. Then the reaction vials were heated at 65 °C for 3 h with monitoring the reaction by LC/MS. After 3 hours, 100  $\mu$ L of MeOH were added and the acylation products were purified by reversed-phase HPLC (Agilent HPLC 1100 Series, Alltech C<sub>18</sub> semipreparative column, 10 mm  $\times$  250 mm, 2 mL/min, gradient 0-10 min: 20% aqueous CH<sub>3</sub>CN / 10-50 min: 20-100% aqueous CH<sub>3</sub>CN). *S*-MTPA ester (**6**) and *R*-MTPA ester (**7**) were eluted at 43.3 and 43.5 min respectively. The molecular formulas for *S*- and *R*-MTPA esters were confirmed as C<sub>50</sub>H<sub>74</sub>F<sub>3</sub>N<sub>9</sub>O<sub>15</sub> by ESI-HRMS analysis ( $[M-H_2O+H]^+$  *m/z* at 1080.5253 for *S*-MTPA ester and at 1080.5255 for *R*-MTPA ester, calculated at 1080.5229). The <sup>1</sup>H chemical shifts of *S*- and *R*-MTPA esters were assigned by <sup>1</sup>H, gCOSY, and TOCSY NMR spectral analysis. The  $\Delta\delta$  values in Fig. 5 determined the absolute configuration of the secondary alcohol at C-7 as *S*.<sup>5</sup>

### ***S*-MTPA ester (7-*S*-methoxy-trifluoromethyl-phenyl acetyl dentigerumycin ester, 6):**

<sup>1</sup>H NMR (600 MHz, CDCl<sub>3</sub>)  $\delta$  0.79 (3H, d, *J* = 7.0 Hz) 0.80 (3H, t, *J* = 7.5 Hz), 0.87 (3H, t, *J* = 7.5 Hz), 0.93 (3H, d, *J* = 7.0 Hz), 0.99 (2H, m), 1.22 (1H, m), 1.28 (3H, d, *J* = 7.5 Hz), 1.37 (3H, s), 1.38 (2H, m), 1.48 (2H, m), 1.51 (3H, d, *J* = 7.0 Hz), 1.53 (2H, m), 1.61 (2H, m), 1.71 (4H, m), 1.82 (1H, m), 1.94 (2H, m), 1.95 (1H, m), 1.96 (1H, m), 2.02 (2H, m), 2.76 (1H, m), 2.78 (1H, m), 3.02 (1H, m), 3.04 (1H, m), 3.13 (1H, d, *J* = 12.0 Hz), 3.22 (1H, d, *J* = 12.0 Hz), 3.49 (3H, s), 3.66 (1H, m), 4.18 (1H, d, *J* = 12.5 Hz), 4.24 (1H, m), 4.76 (1H, dd, *J* = 11.0, 11.0 Hz), 5.04 (1H, br. d, *J* = 7.5 Hz), 5.08 (1H, m), 5.10 (1H, m), 5.23 (1H, dd, *J* = 11.0, 1.5 Hz), 5.63 (1H, m), 5.64 (1H, m), 5.74 (1H, q, *J* = 7.0), 5.84 (1H, d, *J* = 12.0 Hz), 6.22 (1H, d, *J* = 9.0 Hz), 7.41 (3H, m), 7.52 (2H, m), 8.68 (1H, d, *J* = 11.0 Hz).

***R*-MTPA ester (7-*R*-methoxy-trifluoromethyl-phenyl acetyl dentigerumycin ester, 7):**

<sup>1</sup>H NMR (600 MHz, CDCl<sub>3</sub>) δ 0.80 (3H, t, *J* = 7.5 Hz), 0.81 (3H, d, *J* = 7.0 Hz), 0.87 (3H, t, *J* = 7.5 Hz), 0.91 (3H, d, *J* = 7.0 Hz), 0.99 (2H, m), 1.17 (3H, d, *J* = 7.5 Hz), 1.22 (1H, m), 1.37 (3H, s), 1.38 (2H, m), 1.48 (2H, m), 1.50 (3H, d, *J* = 7.0 Hz), 1.52 (2H, m), 1.61 (2H, m), 1.72 (4H, m), 1.83 (1H, m), 1.91 (1H, m), 1.92 (2H, m), 1.93 (1H, m), 2.05 (2H, m), 2.74 (1H, m), 2.78 (1H, m), 2.93 (1H, m), 3.00 (1H, m), 3.06 (1H, m), 3.12 (1H, d, *J* = 14.0 Hz), 3.52 (3H, s), 3.66 (1H, m), 3.88 (1H, d, *J* = 12.5 Hz), 4.23(1H, m), 4.75 (1H, dd, *J* = 11.0, 11.0 Hz), 5.05 (1H, br. d, *J* = 7.5 Hz), 5.08 (1H, br. d, *J* = 13.0 Hz), 5.20 (1H, m), 5.23 (1H, dd, *J* = 11.0, 1.5 Hz), 5.53 (1H, dd, *J* = 6.5, 1.5 Hz), 5.63 (1H, m), 5.71 (1H, q, *J* = 7.0 Hz), 5.84 (1H, d, *J* = 12.0 Hz), 6.13 (1H, d, *J* = 9.0 Hz), 7.43 (3H, m), 7.51 (2H, m), 8.67 (1H, d, *J* = 11.0 Hz).

**Reduction of *N*-OH in dentigerumycin and determination of the absolute configuration of *N*-hydroxy alanine**

Dentigerumycin (1.0 mg) was dissolved in 2 mL of tetrahydrofuran (THF) under argon. 1 mL of 4.5 M aqueous ammonium acetate and 0.5 mL of a 10 % TiCl<sub>3</sub> solution in 20-30 wt. % HCl were added to the solution in sequence. The mixture was stirred at room temperature for 2 h. The product was extracted with EtOAc (10 mL) and the organic layer was washed with saturated NaHCO<sub>3</sub> (15 mL) and NaCl (15 mL) solutions.<sup>6</sup> The reduction product (15-*N*-deoxydentigerumycin, **8**) was purified at 46.7 min by reversed-phase HPLC (Agilent HPLC 1100 Series, Alltech C<sub>18</sub> semipreparative column, 10 mm × 250 mm, 2 mL/min, gradient 0-10 min: 30% aqueous CH<sub>3</sub>CN / 10-50 min: 30-90% aqueous CH<sub>3</sub>CN). The molecular formula was confirmed as C<sub>40</sub>H<sub>67</sub>N<sub>9</sub>O<sub>12</sub> by ESI-HRMS analysis ([M+Na]<sup>+</sup> *m/z* at 888.4825, calculated at 888.4807). The <sup>1</sup>H and <sup>13</sup>C chemical shifts of 15-*N*-deoxydentigerumycin (**8**) were completely assigned by <sup>1</sup>H, gCOSY, TOCSY, gHSQC, gHMBC, and ROESY NMR spectral analysis (Table 2). As the result of reduction, two alanine units were observed at (1) C-1, C-2, C-3, 2-NH and (2) C-14, C-15, C-16, 15-NH.

15-*N*-deoxydentigerumycin (**8**) was hydrolyzed in 6 N HCl at 115 °C for 1 h, derivatized with L-FDLA, and the L-FDLA derivatives were analyzed by LC/MS as described above. The single L-FDLA derivative originated from two alanine units eluted at 23.9 min, determining that the alanine unit derived from *N*-hydroxy alanine possesses *S* configuration.

**Determination of the 29, 30-diol moiety using CD spectroscopy**

Dentigerumycin (5.8 mg) was dissolved in 1.50 mL of anhydrous dimethyl sulfoxide (DMSO) and the solution was divided exactly to two 0.75 mL aliquots. 4.38 mM DMSO solution of Mo<sub>2</sub>(OAc)<sub>4</sub> was prepared and 0.75 mL of the solution was added to 0.75 mL of prepared dentigerumycin solution to make 2.19 mM dentigerumycin and Mo<sub>2</sub>(OAc)<sub>4</sub> mixture solution.

After 40 min, a CD spectrum was recorded for induced CD. The other 0.75 mL of dentigerumycin solution was diluted to 1.50 mL with 0.75 mL of anhydrous DMSO and an inherent CD spectrum was obtained. The inherent molar CD spectrum was subtracted from the induced molar CD spectrum. The negative sign of the diagnostic band at 305 nm is correlated to the absolute configuration of the 29, 30-diol moiety, determining 29*S* and 30*R* absolute configurations based on the preferred conformation of the complex.<sup>7</sup>

### **Plate antifungal assay**

The parasitic fungal strain *Escovopsis* CC011120-4 was plated on YMEA agar plates. The plate cultures were incubated for 2 days at 30 °C. Sterile paper disks (2.5 mm diameter) were placed on the agar plates, not touching the fungal culture. Ethyl acetate extracts and fractions of *Pseudonocardia* sp. CC011120-4 cultures and pure dentigerumycin (**1**) were dissolved in DMSO at various concentrations and applied to the paper disks on the plates. For negative control, pure DMSO was also applied to a disk on each assay plate. The cultures were incubated at 30 °C and monitored for inhibition. The fungal cultivar CC01120-4 was cultivated from the center of YMEA plates. Since the fungal cultivar grows much slowly, the plates were incubated at 30 °C for 14 days before dentigerumycin was applied on paper disks. After applying dentigerumycin, the cultures were placed in a 30 °C incubator and monitored for inhibition.

### **Liquid antifungal assay**

The *Escovopsis* strain CC011120-4 was cultivated on potato dextrose agar plates. The mycelia were collected and homogenized in potato dextrose broth medium. The suspension was transferred to the wells in 96-well plates and various concentrations of pure dentigerumycin were applied. The plates were incubated at 37 °C for 48 h and alamarBlue (Soretex Ltd.) was added. The fluorescence was measured with excitation at 540 nm and emission at 590 nm by Wallac Vector 2 plate reader after 15 -18 h. A liquid antifungal assay was not applicable to the mutualistic fungus because it grows extremely slow in liquid culture. Bioassays against *Candida albicans* strains (wild type, ATCC10231, ATCC200955) were performed as described above but without cell homogenization.

### **Supplementary References**

1. Cafaro, M.J. & Currie, C.R. *Can. J. Microbiol.* **51**, 441-446 (2005).
2. Matsumori, N., Kaneno, D., Murata, M., Nakamura, H. & Tachibana, K. *J. Org. Chem.* **64**, 866-876 (1999).
3. Miller, E.D., Kauffman, C.A., Jensen, P.R. & Fenical, W. *J. Org. Chem.* **72**, 323-330 (2007).

4. Fujii, I.K., Ikai, Y., Oka, H., Suzuki, M. & Harada, K. *Anal. Chem.* **69**, 5146-5151 (1997).
5. Séco, J.M., Quiñoa, E. & Riguera, R. *Tetrahedron: Asymmetry* **12**, 2915-2925 (2001).
6. Pennings, M.L.M., Reinhoudt, D.N., Harkema, S. & van Hummel, G.J. *J. Org. Chem.* **48**, 486-491 (1983).
7. Snatzke, G., Wagner, U. & Wolff, H.P. *Tetrahedron* **37**, 349-361 (1981).
